# Supplementary material
Source: PubMed Central journal article supplement (PMC2718450)
Supplement: supp_172_1_92__1.pdf [file supp_172_1_92__1.pdf]

## **The Role of Hyaluronan Synthase 3 in Ventilator-Induced Lung Injury**

Kuan-Jen Bai, Andrew P. Spicer, Marcella M. Mascarenhas, Lunyin Yu, Hari G. Garg, and

Deborah A. Quinn

**Online Data Supplement**

## Gene Targeting

The targeting vector was designed such that insertion of the selectable marker cassette (PGKneo) would delete a large portion of the 3<sup>rd</sup> intron in addition to the splice acceptor sequence immediately preceding exon 4 plus the first 300 nucleotides, encoding 100 amino acids within the proposed catalytic region for the hyaluronan synthase 3 (Has3) polypeptide. An endogenous KpnI site was used for this purpose. In total, the targeting vector included 7 kilobase pairs of homology, with a 1.5 kilobase pair 5' arm and a 5.5 kilobase pair 3' arm. The linearized targeting vector was electroporated into GK129 ES cells as previously described (E1). Resistant clones were expanded and screened by Southern hybridization with a 3' flanking probe to detect clones that had undergone the desired homologous recombination event. Clones identified in this way were expanded and subjected to Southern analyses with a panel of probes including a neo cassette probe, Has3 internal probe and 5' and 3' flanking probes. Correctly targeted clones were determined to have undergone the desired recombination event, with no additional rearrangements or insertions detected.

Two correctly targeted clones were expanded and microinjected into 3.5 day post coitum (dpc) C57BL/6J blastocysts using standard procedures. Microinjected blastocysts were surgically transferred to the uterine horns of 2.5 dpc pseudopregnant CD1 female mice. Chimeric animals were identified on the basis of coat color; agouti and/or white/cream coat color being indicative of ES cell contribution.

## **Ventilator Protocol**

The animals were anesthetized by intraperitoneal ketamine (90 mg/kg) (Abbott Laboratories, N. Chicago, IL) and xylazine (10 mg/kg) (Burns Veterinary Supply Inc. Rockville Centre, NY) while breathing room air. Throughout the experiment, animals were placed in a supine position on a heating blanket and body temperature was monitored with a rectal probe. A 20-gauge angiocatheter (Becton Dickinson Infusion Therapy System Inc, Sandy, UT) was inserted into trachea and connected to a Harvard apparatus ventilator, model 55-7058 (Holliston, MA). The mice were then ventilated either at 6 ml/kg with a rate of 120-140 breaths per minute or 30 ml/kg with a rate of 55-65 breaths per minute in room air. End tidal CO<sub>2</sub> was monitored intermittently by a microcapnograph (Columbus Instruments, Columbus, OH) and was kept at 30-40 mmHg by adjusting the respiratory rate of ventilator. The V<sub>T</sub> was increased by 5 ml/min to correct the air loss from sample flow adaptor during monitoring of end tidal CO<sub>2</sub>. During the period of ventilator use, intraperitoneal ketamine 0.05mg/g and xylazine 0.005 mg/g were administered every 30 minutes, and 0.9% NaCl was infused continuously at a rate of 0.009 ml/g/hr to maintain blood pressure. Harvesting of lung and bronchoalveolar lavage (BAL) were performed after 5 hours of ventilation in the high V<sub>T</sub> and low V<sub>T</sub> groups, or immediately after the anesthesia in control groups of animals.

## **Lung Lavage**

At the end of the experiments, lungs were lavaged through the tracheal tube three times with 0.6

ml sterile 0.9% NaCl. One ml of the pooled effluents was used for cytopsin and subsequent cell differentials, and 100  $\mu$ l was used for total neutrophil counts. The remaining effluents were centrifuged at 2,000 rpm for 10 minutes at 4°C, after which the supernatants were frozen at -80°C for further measurement of total protein, MIP-2, and HA.

### **BAL Cell Counts**

Neutrophil counts in BAL were used to measure migration of neutrophils into the alveoli and airways (E2). Total cell counts in lavage fluid were performed by use of a hemocytometer (n = 5 in control and low  $V_T$  groups, n = 7 in Has3<sup>-/-</sup> and n = 10 in wild-type of high  $V_T$  group). To perform cell differentials, cells in lavage fluid were fixed on glass slides by using cytopsin and then stained with a hematologic stain kit (Fisher Diagnostics, Middletown, VA).

### **Measurement of MIP-2 in Lavage Fluid**

MIP-2 protein in BAL was measured with a commercially available enzyme-linked immunosorbent assay (ELISA) kit containing antibodies that were cross-reactive with rat and mouse MIP-2 (Biosource International, Camarillo, CA) (E3). All the procedures were performed according to the protocol provided by the manufacturer (n = 5 in control and low  $V_T$  groups, n = 7 in Has3<sup>-/-</sup> and n = 10 in wild-type of high  $V_T$  group).

### **Reverse Transcription-polymerase Chain Reaction (RT-PCR) for MIP-2 and Has**

Lung total cellular RNA was isolated by use of a total RNA isolation kit (Ambion Inc., Austin, TX). After determining the concentration, 1  $\mu$ g of RNA was reverse-transcribed into cDNA

and amplified with a Gene Amp PCR core kit (PerkinElmer Life Science, Boston, MA) following the manufacturer's instructions (n = 2 per group). The procedure of reverse transcription was performed at 42°C for 45 min, after which enzyme was inactivated by a 5-min incubation at 99°C.

Mouse Has sequences were used for this analysis. The primers had the following sequences:

Has1 Forward 5'-AGT ATA CCT CGC GCT CCA GA-3', Has1 Reverse 5'-AGC AGC AGT

AGA GCC CAG AG-3'; Has2 Forward 5'-AAC AGG GTG TTG AGT CTG GG-3', Has2

Reverse 5'-TAA ACC ACA CGG ACA CTG GA-3'; and Has3 Forward 5'-CGG GTG AAG

GAG AGA CAG AG-3', Has3 Reverse 5'-GCA ATG AGG AAG AAT GGG AA-3'. These

resulted in reaction products of 481 bp for Has1, 502 bp for Has2, and 712 bp for Has3. The

primer sequences for MIP-2 were Forward 5'-GAA CAA AGG CAA GGC TAA CTGA-3' and

Reverse 5'-AAC ATA ACA ACA TCT GGG CAAT-3', which resulted in a product of 195 bp.

PCR for glyceraldehyde-6-phosphate dehydrogenase (GAPDH) was performed as a control,

using the following primers: Forward 5'-AAT GCA TCC TGC ACC ACC AA-3' and Reverse

5'-GTA GCC ATA TTC ATT GTC ATA-3', which yielded a 516-bp product.

### **Lung Myeloperoxidase Assay**

Lung myeloperoxidase (MPO) activity was used for the quantitative assessment of total

pulmonary neutrophil infiltration in the interstitium, alveolar space, and pulmonary vessels as

previously described (n = 5 in control and low V<sub>T</sub> groups, n = 6 in Has3<sup>-/-</sup> and n = 9 in wild-type

of high  $V_T$  group) (E4-E6). The lungs were homogenized in 5 ml of phosphate buffer (20 mM, pH 7.4) and 1 ml of the homogenate was centrifuged at 10,000 g for 10 minute at 4°C. The resulting pellet was resuspended in 1 ml of phosphate buffer (50 mM, pH 6.0) containing 0.5% hexadecyltrimethylammonium bromide (Sigma Chemical Co., St. Louis, MO). The suspension was then subjected to three cycles of freezing (on dry ice) and thawing (at room temperature), after which it was sonicated for 40 seconds and centrifuged again at 10,000 g for 5 minutes at 4°C. The supernatant was assayed for MPO activity by measuring the hydrogen peroxide ( $H_2O_2$ )-dependent oxidation of 3,3', 5,5'-tetramethylbenzidine (TMB) (Sigma Chemical Co.). In its oxidized form, TMB has a blue color, which was measured spectrophotometrically at 650 nm. The reaction mixture for analysis consisted of 25  $\mu$ l tissue sample, 25  $\mu$ l of TMB (final concentration 0.16 mM) dissolved in dimethylsulfoxide (Sigma Chemical Co.), and 200  $\mu$ l of  $H_2O_2$  (final concentration 0.3 mM) dissolved in phosphate buffer (0.08 M, pH 5.4) minutes prior to adding to mixture. The mixture was incubated for 3 minutes at 37°C and the reaction was stopped by adding 1 ml of sodium acetate (0.2 M, pH 3.0) after which absorbance at 650 nm was measured. The absorbance ( $A_{650}$ ) was reported as units (OD)/g of wet lung weight.

### **Peribronchiolar Neutrophil Infiltration**

After euthanasia, the heart and lungs were removed en bloc and a polyethylene tube was inserted into the trachea. The lungs were filled with 10% neutral buffered formalin at 30 cm  $H_2O$  pressure via the tube and were fixed in formalin solution. After being embedded in paraffin, the

lung tissues were sectioned at 4 $\mu$ m and stained with hematoxylin and eosin. The stained sections were then reviewed in a blinded method by a pathologist. To quantify the infiltration of neutrophils, the number of neutrophils surrounding 10 bronchioles per slide was determined and was expressed as the average number of neutrophils per bronchiole, as previously described (n = 5 in control and low V<sub>T</sub> groups, n = 5 in Has3<sup>-/-</sup> and n = 7 in wild-type of high V<sub>T</sub> group) (E6).

### **Evans Blue Dye Analysis**

Extravasation of Evans blue dye (EBD, Sigma Chemical Co.) into the lung interstitium was used as a quantitative measure of changes of microvascular permeability in acute lung injury (n = 5 in control and low V<sub>T</sub> groups, n = 5 in Has3<sup>-/-</sup> and n = 8 in wild-type of high V<sub>T</sub> group) (E7-E9). Briefly, 30 mg/kg of EBD was injected through the internal jugular vein 30 minutes before the end of mechanical ventilation. At the end of the experiments, each mouse was euthanized by exsanguination from the abdominal aorta and 1 ml of 0.9% NaCl was injected into the beating right ventricle to flush intrapulmonary vascular blood. The lungs were removed en bloc and homogenized in 5 ml formamide (Sigma Chemical Co.) for 2 minutes. The mixture was incubated at 37°C overnight and then centrifuged at 5,000 g for 30 minutes. EBD in supernatant was quantitated by the dual wavelength (620 and 740 nm) spectrophotometric method as described previously (E9, E10). This method allows for correction of contaminating heme pigments, as determined by the formula: corrected absorbance at 620 nm = measured absorbance

620 nm – (1.426 × absorbance at 740 nm + 0.03). Concentration of EBD was determined from generated EBD standard absorbance curves and expressed as EBD  $\mu\text{g}$  / mg wet weight of lung.

### **Protein Measurement in Lavage Fluid**

Total protein concentration of lavage fluid was determined by the Bradford method (n = 5 per group) (E11). The mixture of lavage fluid and Bradford assay reagent (Bio-Rad Laboratories Inc., Hercules, CA) was read at 595 nm with bovine serum albumin (Bio-Rad Laboratories Inc.) as a standard.

### **Histochemical Stain of Total Hyaluronan**

The process for lung harvest and tissue sections for staining was the same as that described for peribronchiolar neutrophil infiltration. The sections were then incubated with a biotinylated fragment of hyaluronan (HA) binding protein (bHABP, Seikagaku Corp., Tokyo, Japan) of aggrecan. After washing, the bHABP was detected using horseradish peroxidase–conjugated streptavidin (Vectastain Elite ABC kit; Vector Laboratories, Burlingame, CA).

Diaminobenzadine (Sigma Chemical Co.) was then used to develop the color reaction (n = 1 per group).

### **Extraction and Analysis of Hyaluronan**

Approximately 1 g of lung tissues (from five animals) was extracted under dissociative conditions using 4 M guanidium HCl, 50 mM sodium acetate, 9 mM sodium-ethylenediamin tetraacetic acid (Na-EDTA), 1 mM p-chloromercuribenzoate and 1mM phenylmethylsulfonyl



fluoride pH 5.8, for 30 seconds, three times. The homogenate was stirred for 48 hours and then centrifuged at 200,000 g for 30 minutes. The supernatants were diluted to 1:50 and total HA was measured by use of ELISA. Briefly, high bound ELISA plates (Falcon, Lincoln Park, NJ) were coated with HA (Sigma Chemical Co.) overnight. After being washed with PBS, the plates were then blocked with 10% calf serum in PBS for 1 hour, followed by exhaustive washing with water. The 25  $\mu$ l diluted sample was mixed with 100  $\mu$ l bHABP (2 mg/ml) for 1 hour at 37°C, then transferred to the HA-coated ELISA plates and shaken for 1 hour at 37°C. After washing, the bHABP was detected by use of horseradish peroxidase-conjugated streptavidin. The color reaction was detected using 1,2-phenylene-Diamine Dihydrochloride tablets (Rainbow Inc., Windsor, CT) and read at 490 nm on ELISA reader. The concentration of HA was determined by a standard curve made from 0.01 to 4  $\mu$ g/ml of HA (2 sets, and n = 5 per group in each set for lung tissues HA measurement, n = 4 per group for BAL HA measurement).

### **Size Fractionation of Hyaluronan**

Lung extract was precipitated overnight with 80% ethanol at 4°C. The precipitate was centrifuged at 200,000 g for 30 minutes. The residue was dissolved in 4 M guanidinium HCl, 50 mM sodium acetate, 9 mM Na-EDTA, 1 mM p-chloromercuribenzoate and 1 mM phenylmethylsulfonyl fluoride at pH 5.8 for further size fractionation. The sample was fractionated on Sepharose CL-4B size exclusion chromatography (150 cm x 2 cm), which was equilibrated in dissociative conditions using 4 M guanidinium HCl, 50mM sodium acetate, 9 mM

Na-EDTA, 1 mM p-chloromercuribenzoate and 1 mM phenylmethylsulfonyl fluoride pH 5.8.

The column was calibrated in the following manner: void volume ( $V_o$ ) was measured using dextran blue 2000; total volume ( $V_t$ ) was measured using uronic acid. HA sizes were determined by relative elution volume ( $K_{av}$ ) compared with three HA standards of known molecular weight (Sigma Chemical Co. and Biomatrix Inc., Ridgefield, NJ).  $K_{av}$  was calculated from the equation:  $K_{av} = (elution\ volume - V_o) / (V_t - V_o)$ . The three HA standards, 1,600 kD HMW HA, 370 kD LMW HA, and 178 kD LMW HA had  $K_{av}$  of 0.17; 0.33; and 0.8, respectively (n = 5 per group). HA peaks were detected using HA ELISA as described above.

## REFERENCE

- E1. Spicer AP, Rowse GJ, Lidner TK, Gendler SJ. Delayed mammary tumor progression in Muc-1 null mice. *J Biol Chem* 1995;270:30093-30101.
- E2. Blackwell TS, Lancaster LH, Blackwell TR, Venkatakrisnan A, Christman JW. Chemotactic gradients predict neutrophilic alveolitis in endotoxin-treated rats. *Am J Respir Crit Care Med* 1999;159:1644-1652.
- E3. Schwartz DA, Quinn TJ, Thorne PS, Sayeed S, Yi AK, Krieg AM. CpG motifs in bacterial DNA cause inflammation in the lower respiratory tract. *J Clin Invest* 1997;100:68-73.
- E4. Quinn DA, Moufarrej RK, Volokhov A, Hales CA. Interactions of lung stretch, hyperoxia,

- and MIP-2 production in ventilator-induced lung injury. *J Appl Physiol* 2002;93:517-525.
- E5. Goldblum SE, Wu KM, Jay M. Lung myeloperoxidase as a measure of pulmonary leukostasis in rabbits. *J Appl Physiol* 1985;59:1978-1985.
- E6. Li LF, Yu L, Quinn DA. Ventilation-induced neutrophil infiltration depends on c-Jun N-terminal kinase. *Am J Respir Crit Care Med* 2004;169:518-524.
- E7. Green TP, Johnson DE, Marchessault RP, Gatto CW. Transvascular flux and tissue accrual of Evans blue: effects of endotoxin and histamine. *J Lab Clin Med* 1988;111:173-183.
- E8. Saria A, Lundberg JM. Evans blue fluorescence: quantitative and morphological evaluation of vascular permeability in animal tissues. *J Neurosci Methods* 1983;8:41-49.
- E9. Choi WI, Quinn DA, Park KM, Moufarrej RK, Jafari B, Syrkina O, Bonventre JV, Hales CA. Systemic microvascular leak in an in vivo rat model of ventilator-induced lung injury. *Am J Respir Crit Care Med* 2003;167:1627-1632.
- E10. Belperio JA, Keane MP, Burdick MD, Londhe V, Xue YY, Li K, Phillips RJ, Strieter RM. Critical role for CXCR2 and CXCR2 ligands during the pathogenesis of ventilator-induced lung injury. *J Clin Invest* 2002;110:1703-1716.
- E11. Bradford MM. A rapid and sensitive method for the quantitation of microgram quantities of protein utilizing the principle of protein-dye binding. *Anal Biochem* 1976;72:248-254.
